# Supplementary material for: Microalgae as a novel biofactory for biocompatible and bioactive extracellular vesicles
Source: Research Square preprint supplement (doi:10.21203/rs.3.rs-2841234/v1), 2023-10-17
Supplement: Supplementary file 1 [file d527238dd3ca26478ddefe44.docx]

**- Supplementary Information –**

**Microalgae as a novel biofactory for biocompatible and bioactive extracellular vesicles**

Giorgia Adamo1,#, Pamela Santonicola2,#, Sabrina Picciotto1,#, Paola Gargano1, Aldo Nicosia1, Valeria Longo4, Noemi Aloi4, Daniele Paolo Romancino1, Angela Paterna3, Estella Rao3, Samuele Raccosta3, Rosina Noto3, Monica Salamone1, Salvatore Costa5, Caterina Di Sano6, Giuseppina Zampi2, Paolo Colombo4, Mingxing Wei7, Nicolas Touzet8, Mauro Manno3, Elia Di Schiavi2,¶ and Antonella Bongiovanni1,¶,*

1 Cell-Tech HUB at Institute for Research and Biomedical Innovation, National Research Council of Italy (CNR), Palermo 90146, Italy.

2 Institute of Biosciences and BioResources, National Research Council (CNR), Naples 80131, Italy.

3 Cell-Tech HUB at Institute of Biophysics, National Research Council of Italy (CNR), Palermo 90146, Italy.

4 Institute for Research and Biomedical Innovation, National Research Council of Italy (CNR), Palermo 90146, Italy.

5 Department of of Biological, Chemical and Pharmaceutical Sciences and Technologies, University of Palermo, 90128 Palermo, Italy

6 Institute of Translational Pharmacology, National Research Council of Italy (CNR), Palermo 90146, Italy.

7 Cellvax SAS, Villejuif Bio Park, 1 Mail du Professeur Georges Mathé, 94800 Villejuif, France.

8 Department of Environmental Science, School of Science, Centre for Environmental Research, Innovation and Sustainability, CERIS, Atlantic Technological University Sligo, Sligo, Ireland.

#These first authors contributed equally to this work.

¶These last authors contributed equally to this work.

*Corresponding author: [antonella.bongiovanni@cnr.it](mailto:antonella.bongiovanni@cnr.it)

**- Supplementary Figures -**

a) b)


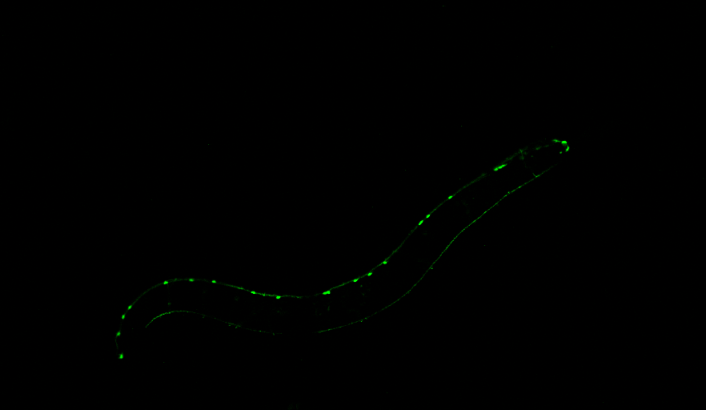

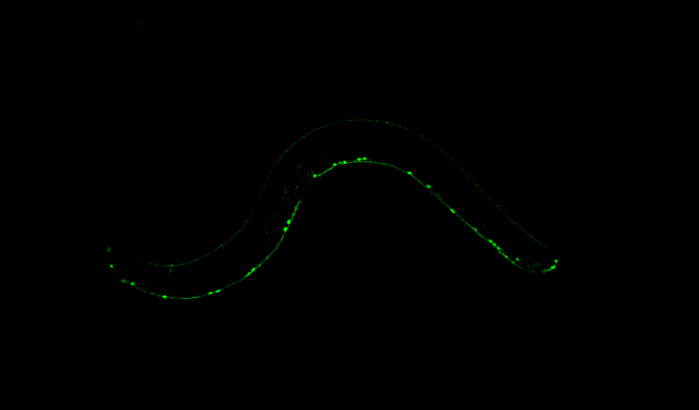


mock

Algosome

*

*

*

*

*

*

*

*

**

*

*

*

**

*

***

*

*

*

*

*

*

**

**

*

**

*

**

*

*

*


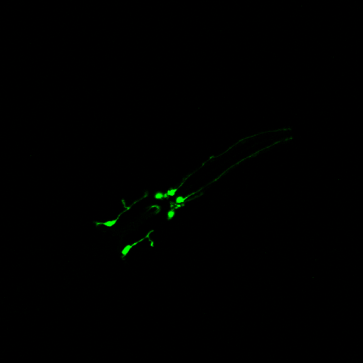


mock


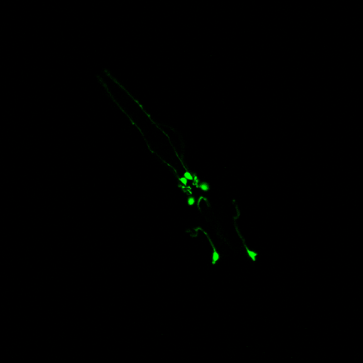


Algosome

*

*

*

*

*

*

*

*

*

*

*

*

c)


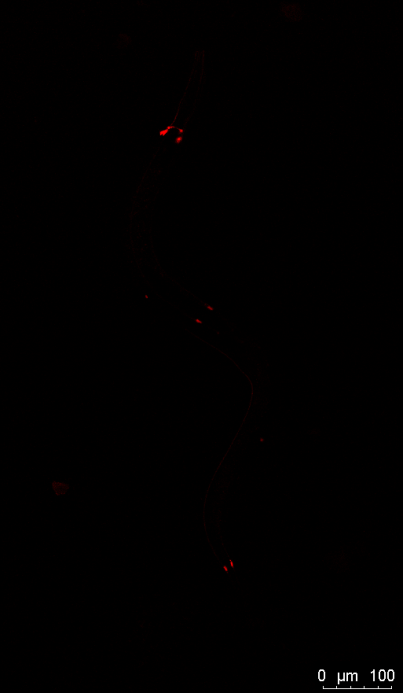

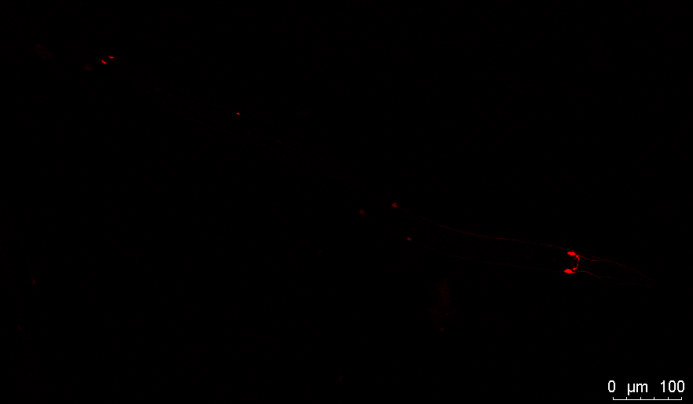


mock

Algosome

*

*

*

*

*

*

*

*

*

*

*

**Supplementary Figure 1**. **Nanoalgosome treatment has no effect on neuron morphology and viability**. **a)** Representative images of transgenic animals expressing the GFP in GABA MNs treated with mock (upper panel) or nanoalgosomes (20 ng/µL) (lower panel). Dashed lines mark the shape of the animals, asterisks are in correspondence of each neuron (19 in wild-type). Scale bar is 100µm. Anterior is left, ventral is down.

**b)** Representative pictures of transgenic animals expressing GFP in the dopaminergic neurons of the head (CEP and ADE) treated with mock (upper panel) or nanoalgosomes (20 ng/µL) (lower panel). Dashed lines mark the head and part of the body of the animal, asterisks are in correspondence of each neuron (6 in wild-type). Scale bar is 75µm. Anterior is left. **c)** Representative pictures of transgenic animals expressing mCherry in the mechanosensory neurons treated with mock (upper panel) or nanoalgosomes (20 ng/µL) (lower panel). Dashed lines mark the shape of the animals, asterisks are in correspondence of each neuron (6 in wild-type). The injection marker (odr-1p::RFP) is marked by brackets. Scale bar is 100µm. Anterior is left, ventral is down.

**- Supplementary Figures -**

**Supplementary Figure 2**. **DiR-labeled nanoalgosomes quality control**. **a)** NTA measurements show a typical size nanoalgosome distribution after the DiR-labeling, with a larger population of vesicles around 100 nm. **b)** The Odyssey IR scanner was used to measure the intensity of infrared fluorescent emissions (λ800nm) of DiR-labeled nanoalgosomes and free dye control (after washing steps to remove free dye).

**- Supplementary Figures -**


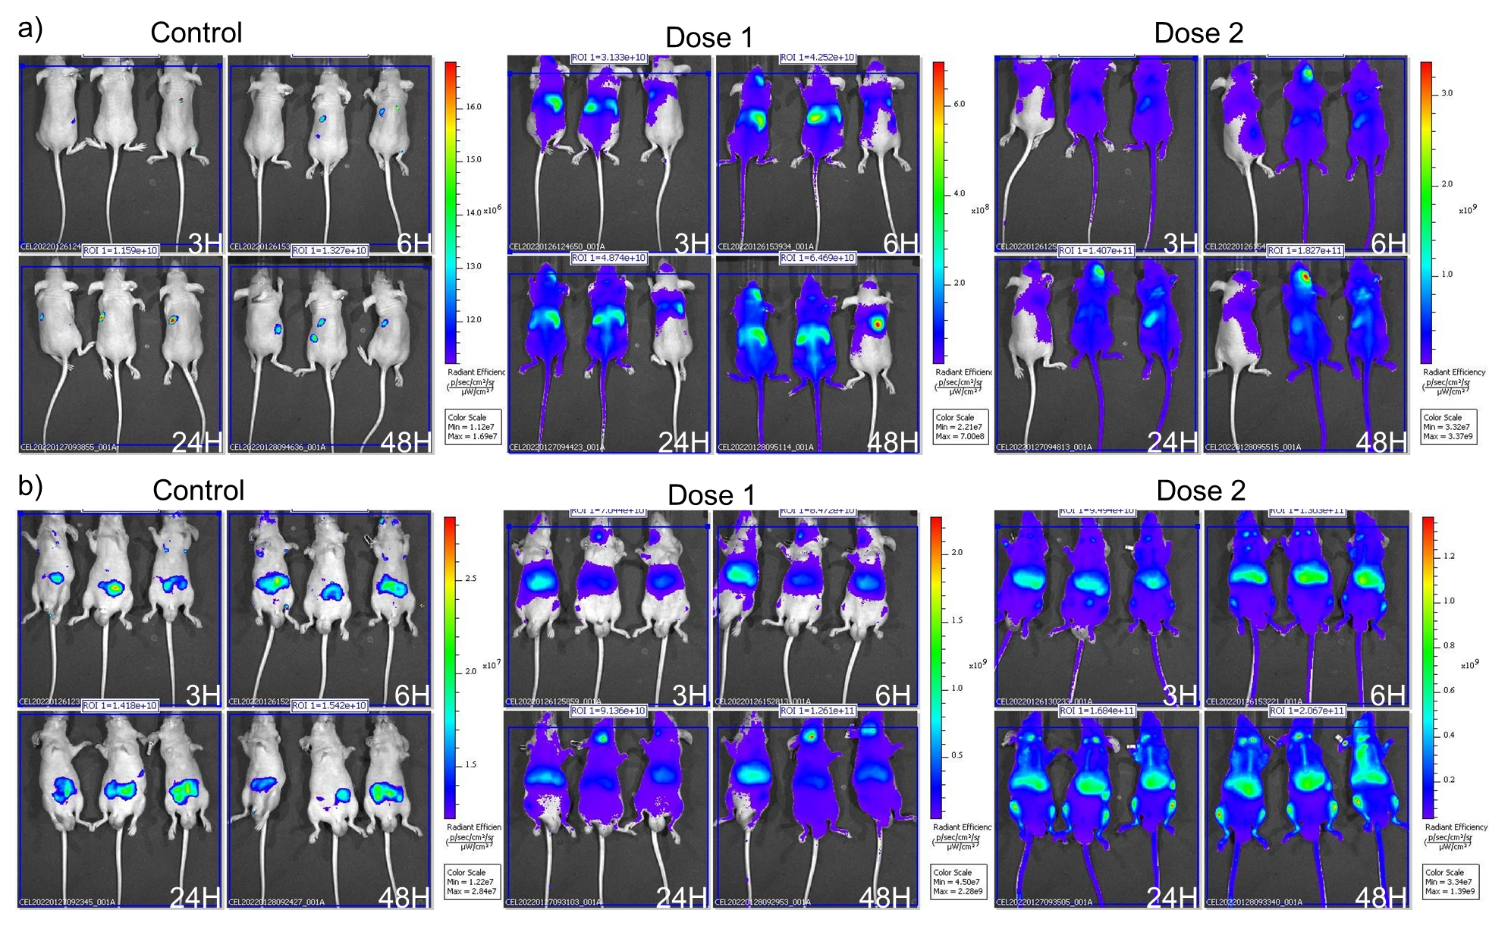


**Supplementary Figure 3**. **IVIS imaging of DiR-labeled nanoalgosome biodistribution in nude mice after IV injection**. **a)** Nude mice (n=3; female, prone) and **b)** (n=3; male, supine) nude mice were injected with v/v of free dye control/200 µL/mouse; dose 1: 10µg nanoalgosomes/200 µL/mouse; dose 2: 50µg nanoalgosomes/200 µL/mouse and control. Nanoalgosome biodistribution was evaluated at 3, 6, 24 and 48h post-injection using an IVIS in vivo imaging system at ex/em 644/665.

**- Supplementary Figures -**


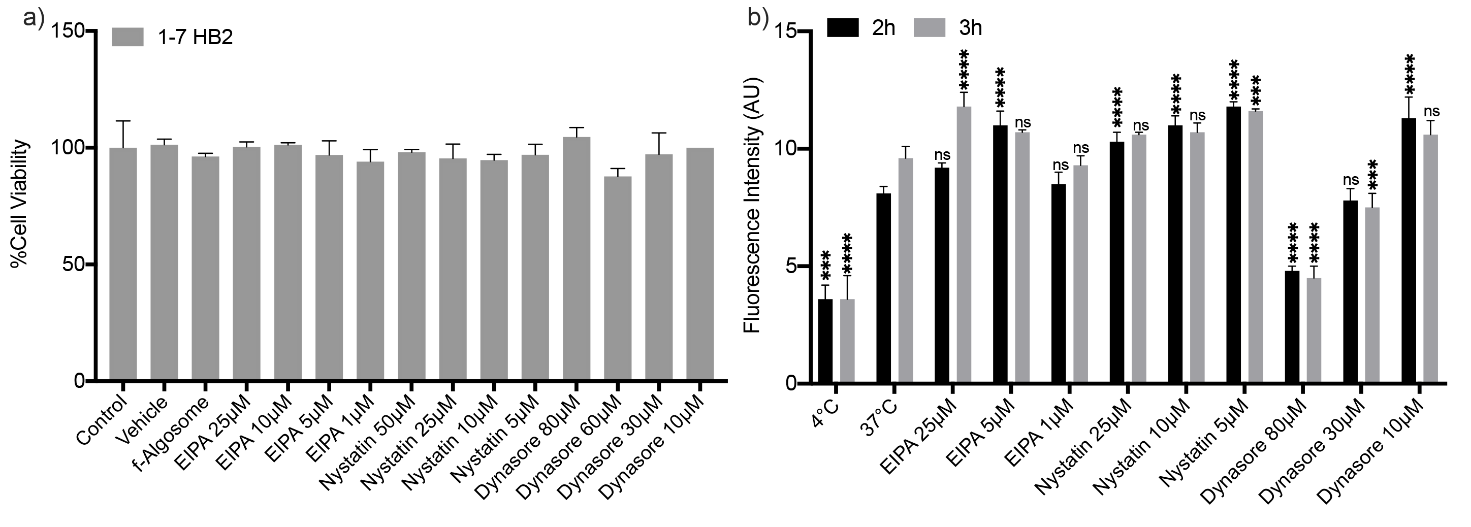


**Supplementary Figure 4**. **Cytotoxicity activities and molecular mechanism of nanoalgosome internalization**. **a)** Test of cytotoxicity activities of Di-8-ANEPPS-labeled (f-Algosome) and different concentrations of EIPA (25, 10, 5, 1 μM); Nystatin (50, 25, 10, 5 μM); Dynasore (80, 60, 30, 10 μM) in 1‐7 HB2, Cell viability is assessed by using MTS (3‐(4,5‐dimethylthiazol‐2‐yl)‐5‐(3‐carboxymethoxyphenyl)‐2‐(4‐sulfophenyl)‐2H‐tetrazolium) assays. Values were expressed as means ± SD of three independent experiments. By Student's t‐test, differences of treated cells were determined not statistically significant when compared with the control. **b)** Effect of metabolic inhibitors of endocytosis on nanoalgosome uptake in 1-7 HB2 cells treated with nystatin, EIPA and dynasore. Results are presented as arbitrary unit of nanoalgosome fluorescence intensity inside cells after 2 and 3h of incubation. One-way ANOVA statistical test was used to assess the statistical significance of the differences: 37°C (2h) (3h) vs 4°C (2h) (3h), EIPA (25,5,1 µM) (2h) (3h), nystatin (25,10,5 µM) (2h) (3h) and dynasore (80,30,10 µM) (2h) (3h), ***p<0,001,****p<0,0001, ns=not significant.

**- Supplementary Figures -**

**Supplementary Figure 5**. **Intracellular nanoalgosomes localization.** Representative fluorescence microscopy images showing the co-localization of PKH26-labeled nanoalgosome (PKH26) with the endosomal protein CD63 (tetraspanin CD63, green), lysosomal protein Lamp1 (green) and endoplasmic reticulum protein Calnexin (green) in MDA-MB 231 cell lines (nuclei in blue) after 24h of PKH26-nanoalgosome incubation. Magnification 40X. Scale bar 100 μm.

**- Supplementary Figures -**


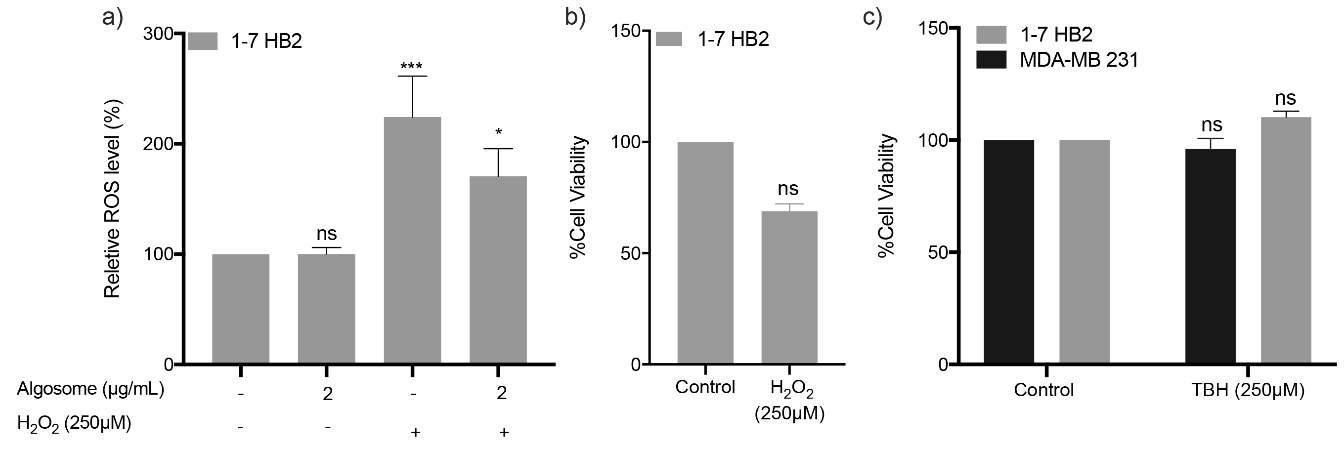


**Supplementary Figure 6**. **Antioxidant bioactivity of nanoalgosomes and cytotoxicity activities of oxidant agent in model cellular systems**. **a)** Percentage of ROS production in 1-7 HB2 cells treated with nanoalgosomes (2 µg/mL) for 24h, with/without oxidant agent (250 µM H2O2), normalized to untreated cells. Values are means ± SEM of three independent experiments. One-way ANOVA was used to assess the statistical significance of the differences: 1-7 HB2 vs 1-7 HB2+ 2µgr/mL nanoalgosome, ns=not significant; 1-7 HB2 vs 1-7 HB2 + oxidant agent (250 µM H2O2), ***p<0,001; 1-7 HB2 vs 1-7 HB2 + oxidant agent (250 µM H2O2) + 2µgr/mL nanoalgosome, *p<0.05. **b)** Test of cytotoxicity activities of oxidant agent (250 µM H2O2) in 1-7 HB2 cells and **c)** oxidant agent (250 µM TBH) in -7 HB2 cells and MDA 231. Cell viability is assessed by using MTS (3‐(4,5‐dimethylthiazol‐2‐yl)‐5‐(3‐carboxymethoxyphenyl)‐2‐(4‐sulfophenyl)‐2H‐tetrazolium) assays. Values were expressed as means ± SD of three independent experiments. By Student's t‐test, differences of treated cells were determined not statistically significant when compared with the control.

**- Supplementary Figures -**


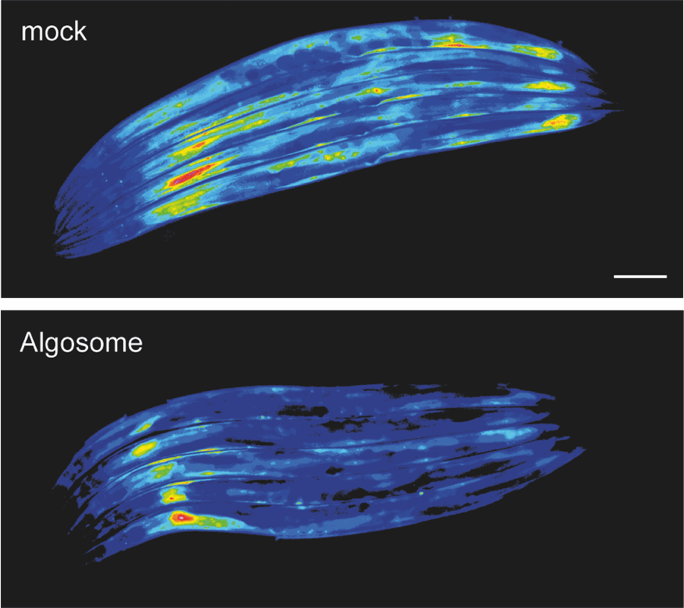


**Supplementary Figure 7**. **Chronic treatment with nanoalgosomes decreases the expression level of gst-4**. Representative images of gst-4p::GFP transgenic animals after treatment with nanoalgosomes (20 ng/µL) (lower panel) or mock (upper panel). Images have been false-colored using Image J to allow the visualization of the different fluorescence intensity. Blue colors represent lower signal intensity, and red higher ones. Scale bar is 75µm. Anterior is left.

**- Supplementary Figures -**

**
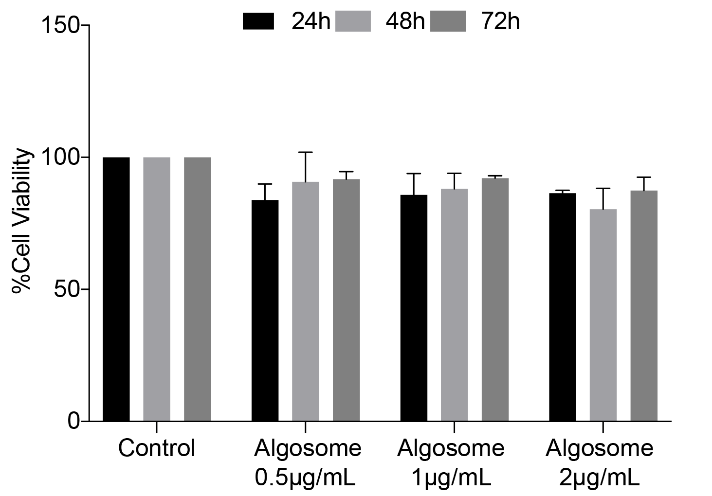
**

**Supplementary Figure 8**. **Cytotoxicity of nanoalgosome in THP-1**. Cytotoxicity of nanoalgosomes in immune-responsive THP-1 cells at different nanoalgosome concentrations (0.5,1, 2 μg/mL) for different time of incubation (24, 48 and 72 h). Values were expressed as means ± SD of three independent experiments. By Student's t‐test, differences of treated cells were determined not statistically significant when compared with the control.

**- Supplementary Tables –**

|  | **Weight (3 Days)** | **Weight (6 Days)** |
| --- | --- | --- |
| Control | 22,3 | 23,2 |
| 19,9 | 20,1 |
| 18,9 | 19,7 |
| 16,4 | 18,3 |
| 16,0 | 18,1 |
| 16,4 | 16,6 |
| **Mean** | **18,3** | **19,3** |
| **SD** | **2,3** | **2,1** |
| Dose 1 | 20,9 | 22,6 |
| 21,5 | 22,2 |
| 21,8 | 22,0 |
| 15,8 | 15,9 |
| 18,1 | 17,8 |
| 17,2 | 17,7 |
| **Mean** | **19,2** | **19,7** |
| **SD** | **2,3** | **2,6** |
| Dose 2 | 23,0 | 23,6 |
| 19,3 | 19,4 |
| 23,5 | 23,7 |
| 20,0 | 19,2 |
| 17,2 | 17,6 |
| 16,4 | 17,8 |
| **Mean** | **19,9** | **20,2** |
| **SD** | **2,7** | **2,5** |

**Supplementary Table 1. Animal body weight.** Mice were weighed every 3 days following nanoalgosome injection.

**- Supplementary Tables –**

|  | Negative Control | Anti-FcƐRI | 0.25µg/ml | 0.5µg/ml | 1µg/ml | 2µg/ml |
| --- | --- | --- | --- | --- | --- | --- |
| Subject 1 | 0.6% | 51.4% | 0.6% | 1.9% | 2.8% | 3.6% |
| Subject 2 | 0.3% | 85.9% | 0% | 1.2% | 1% | 2% |
| Subject 3 | 0.9% | 44.2% | 1.6% | 2.3% | 1.5% | 0.9% |

**Supplementary Table 2. Flow cytometry basophil activation test.** Table shows the results of basophil test in three subject analyzed. (C-) indicates a negative control (1XPBS), (Anti-Fc ɛRI) displays a positive control showing a highly specific monoclonal antibody binding to the high affinity IgE binding receptor. The column labeled 0.25, 0.5, 1, and 2 µgr/mL shows the outcomes following treatment with nanoalgosomes at three distinct concentrations.

**- Supplementary Tables –**

| **Gene Name** | **Primer Forward** | **Primer Reverse** | **Gene Bank Accession Number** |
| --- | --- | --- | --- |
| **AKR1C2** | CAGTGGATCTCTGTGCCACATG | CTGGTTGCAGACAGGCTTGTAC | [NM_001135241](https://www.ncbi.nlm.nih.gov/nuccore/NM_001135241) |
| **ALOX12** | CCTCGTTATGCTGAAGATGGAGC | ATTTCGGACCCAGGACTTTGCC | [NM_000697](https://www.ncbi.nlm.nih.gov/nuccore/NM_000697) |
| **ATR** | GGAGATTTCCTGAGCATGTTCGG | GGCTTCTTTACTCCAGACCAATC | [NM_001184](https://www.ncbi.nlm.nih.gov/nuccore/NM_001184) |
| **CAT** | GTGCGGAGATTCAACACTGCCA | CGGCAATGTTCTCACACAGACG | [NM_001752](https://www.ncbi.nlm.nih.gov/nuccore/NM_001752) |
| **CHK1** | GTGTCAGAGTCTCCCAGTGGAT | GTTCTGGCTGAGAACTGGAGTAC | [NM_001114121](https://www.ncbi.nlm.nih.gov/nuccore/NM_001114121) |
| **FTH1** | TGAAGCTGCAGAACCAACGAGG | GCACACTCCATTGCATTCAGCC | [NM_002032](https://www.ncbi.nlm.nih.gov/nuccore/NM_002032) |
| **GPX1** | GTGCTCGGCTTCCCGTGCAAC | CTCGAAGAGCATGAAGTTGGGC | [NM_000581](https://www.ncbi.nlm.nih.gov/nuccore/NM_000581) |
| **GSR** | TATGTGAGCCGCCTGAATGCCA | CACTGACCTCTATTGTGGGCTTG | [NM_000637](https://www.ncbi.nlm.nih.gov/nuccore/NM_000637) |
| **NOS2** | GCTCTACACCTCCAATGTGACC | CTGCCGAGATTTGAGCCTCATG | [NM_000625](https://www.ncbi.nlm.nih.gov/nuccore/NM_000625) |
| **RAD51** | TCTCTGGCAGTGATGTCCTGGA | TAAAGGGCGGTGGCACTGTCTA | [NM_001164269](https://www.ncbi.nlm.nih.gov/nuccore/NM_001164269) |

**Supplementary Table 3. The primer sequences used for gene expression in DNA damage and antioxidant studies**.

**- Supplementary Methods –**

**Nanoalgosome characterization**

**Nanoparticle tracking analysis (NTA).** The size distribution and concentration of nanoparticles were determined using a NanoSight NS300 (Malvern Panalytical, UK). Nanoalgosomes samples were diluted in particle-free water (HPLC-grade Sigma-Aldrich Water filtered by 20 nm using Whatman Anotop filters) to generate a dilution with 20-120 particles per frame. This ensured a concentration within the recommended measurement range of 1-10 × 108 particles/ml. NTA 3.4 Build 3.4.003 (camera level 15-16) was used to analyze five 60-second videos per sample at a syringe speed of 60 in light scattering. Data were further processed using the NanoSight Software NTA 3.1 Build 3.1.46 with a detection threshold of 5.

**Fluorescence nanoparticle tracking analysis (F-NTA).** The Fluorescence nanoparticle tracking analysis (F-NTA) was carried out as describe in Adamo et al., 202019. Briefly, the Di-8-ANEPPS dye was used to label nanoalgosomes, which fluoresces when activated in apolar environments and is specifically enhanced when attached to the lipid membrane of EVs. The fluorescent nanoalgosome (f-algosome) were produced as follows: 5 × 1010 EV particles/ml were stained with 500 nM of 4-(2-[6-(dioctylamino)-2-naphthalenyl]ethenyl)-1-(3-sulfopropyl)pyridinium, DI-8-ANEPPS (Ex/Em: 467/631 nm, ThermoFisher Scientific), previously filtered by 20 nm filters (Whatmann Anotop filters). Following a 1-hour incubation at room temperature, NTA analyses were performed using a NanoSight NS300 instrument (Malvern Panalytical, UK) equipped with a 500LP filter (laser wavelength 488 nm). The camera level was manually adjusted to optimal settings, and the flow rate for the syringe pump was set at 150 μl/s to ensure that f-algosome crossed the main NTA screen field of view in 5 to 10 seconds. Additional settings were adjusted as described in the previous NTA section. To confirm specificity, a negative control was conducted to verify that the probe alone did not emit a fluorescence signal with F-NTA.

**- Supplementary Methods –**

**Atomic force microscopy (AFM).** Atomic Force Microscopy images were performed by using a Nanowizard III scanning probe microscope (JPK instruments) equipped with a 15 μm z-range scanner. Nanoalgosomes were initially concentrated by ultracentrifugation and resuspended in MilliQ water to a final concentration of 5 × 1011 particles/ml, as estimated by NTA. A 30 μl drop of the sample was incubated on freshly cleaved mica for 10 min, and then gently dried under nitrogen flow. AFM images were acquired in tapping mode by using a NSC-15 (Mikromasch) cantilever (typical spring constant 40 N/m, typical tip radius 8 nm).

**Multi angle dynamic light scattering (DLS).** An aliquot of vesicle solution was centrifuged at 1000×g for 10 min at 4 °C in order to remove any dust particles. The supernatant was withdrawn by pipet tips (previously washed by MilliQ water), put directly into a quartz cuvette and incubated at 20 °C in a thermostated cell compartment of a BI200-SM goniometer (Brookhaven Instruments) equipped with a He-Ne laser (JDS Uniphase 1136P) with wavelength λ = 633 nm and a single pixel photon counting module (Hamamatsu C11202-050). The autocorrelation function g2(t) of scattered light intensity was measured at a scattering angle ϑ = 90° by using a BI-9000 correlator (Brookhaven Instruments).

The intensity autocorrelation function g2(t) is related to the size σ of diffusing particles and to their size distribution Pq(σ), by the relation g2(t) = 1 + |β ∫ Pq(σ) exp[−D(σ)q2t]|2, where β is an instrumental parameter, q = 4πñλ−1 sin[ϑ/2] is the scattering vector, with ñ being the refractive index of the medium (ñ=1.3336), and D(σ) is the diffusion coefficient of a particle of hydrodynamic diameter Dh = σ, determined by the Stokes-Einstein relation D(σ) = kBT [3πησ]−1, with T being the temperature, η the medium viscosity, and kB the Boltzmann constant.. The size distribution Pq(σ) is calculated by assuming that the diffusion coefficient distribution is shaped as a Schultz distribution, which is a two-parameter asymmetric distribution, determined by the average diffusion coefficient <D> and its variance V . Two robust parameters may be derived from this analysis: Dz, the z-averaged hydrodynamic diameter (corresponding to the average diffusion coefficient <D>), and PDI, the polydispersity index (PDI = V<D>−2), which is an estimate of the distribution width.

**- Supplementary Methods –**

**Cell viability assay**

Tumoral (MDA-MB 231), normal (HB2 1-7) and immune-responsive (THP-1) cell lines were seeded in 96-well plates at a density of 4x103 cells per well and maintained using suitable culture conditions. In particular, for endocytosis inhibition study, we monitored cell viability for 1-7 HB2 cells treated with each inhibitors at different concentrations (EIPA 25,10,5,1 µM; Nystatin 50,25,10,5 µM; Dynasore 80,60,30,10 µM ) as well as with inhibitor vehicle and with nanoalgosomes (f-Alg, 10 µg/ml).

For the antioxidant study, we monitored cell viability in 1-7 HB2 and MDA MB 231 cells treated with H2O2 or TBH at 250 µM. THP-1 cells were treated with different concentration of nanoalgosomes (0.5, 1, 2 µg/ml) for 24, 48 and 72h.

Specifically, 24 hours after seeding, cells were incubated with different concentrations of nanoalgosomes. Cell viability was evaluated using the CellTiter 96® AQueous one solution reagent (Promega) according to the manufacturer’s instructions. The mean optical density at 490 nm (OD, absorbance) of each wells was used to calculate the percentage of cell viability relative to negative control. Values were expressed as means±standard deviation of three biological samples, each performed in triplicate.

**BCA assays and Immunoblotting analysis.** The nanoalgosome protein content was quantified using the micro-bicinchoninic BCA Protein Assay Kit from Thermo Fisher Scientific. This colorimetric method involves comparing the relative concentration of the sample to a protein standard (bovine serum albumin, BSA) and preparing a calibration curve. The relative absorbance of the BCA soluble compound was measured at 562 nm using a GloMax Discover Microplate Reader. Proteins of three nanoalgosome batches were separated by sodium dodecyl-sulfate polyacrylamide gel electrophoresis (SDS-PAGE) (10%). A total of 10 μg of nanoalgosome samples (in PBS) were mixed with proper volumes of 5X loading buffer (0.25 M Tris-Cl pH 6.8, 10% SDS, 50% glycerol, 0.25 M dithiothreitol (DTT), 0.25% bromophenol blue). Then, the samples were heated at 100◦C for 5 min and loaded in a 10% sodium dodecyl sulfate-polyacrylamide gel for electrophoretic analyses. Proteins were blotted onto polivinilidenfluoro-membranes (PVDF), which

**- Supplementary Methods –**

were blocked with 3% bovine serum albumin (BSA) in TBS-T solution (50 mM Tris HCl pH 8.0, 150 mM NaCl with 0.05% Tween 20) for 1 h at room temperature. The antibodies anti H+-ATPase (dil. 1:1000 in 3% BSA/TBS-T1x, Agrisera), anti-Alix (clone 3A9, dil. 1:150 in 3% BSA/TBS-T 1X) and anti-Enolase (clone A5, dil. 1:400 in 3%BSA/TBS-T1X), were incubated for 1 h at room temperature. After washing, the membrane was incubated for 1 h with secondary antibodies according to the manufacturer’s instructions (horseradish peroxidase-conjugated secondary anti-mouse or anti-rabbit antibodies, Cell Signaling). The membrane were washed four times in TBS-T for 20 min. Immunoblots were evaluated using SuperSignal Pierce ECL (Thermo Fisher Scientific).
